# Supplementary material
Source: PubMed Central journal article supplement (PMC4351867)
Supplement: NIHMS665122-supplement-7.pdf [file NIHMS665122-supplement-7.pdf]

**Table S1. *Francisella* Strains Used in This Study, Related to Experimental Procedures**

| Strain                                      | Description                                                                                                                                                                                                                                                                                                                        | Source     |
|---------------------------------------------|------------------------------------------------------------------------------------------------------------------------------------------------------------------------------------------------------------------------------------------------------------------------------------------------------------------------------------|------------|
| Fn                                          | <i>F. tularensis</i> subsp. <i>novicida</i> Utah 112 strain                                                                                                                                                                                                                                                                        | *          |
| Fn-FLAG-VgrG                                | Fn expressing FLAG-VgrG; chromosomal <i>vgrG</i> (FTN_1312) replaced by a copy of <i>vgrG</i> fused with the coding sequence for 3xFLAG epitope at its 5' end                                                                                                                                                                      | This study |
| Fn-FLAG-VgrG $\Delta iglA$                  | Fn-FLAG-VgrG with deletion of <i>iglA</i> (FTN_1324)                                                                                                                                                                                                                                                                               | This study |
| Fn-IgIA-GFP                                 | Fn expressing IgIA-GFP; chromosomal <i>iglA</i> replaced by a copy of <i>iglA</i> fused with the coding sequence for superfolder GFP at its 3' end                                                                                                                                                                                 | This study |
| Fn-IgIA-GFP $\Delta iglB$                   | Fn-IgIA-GFP with deletion of <i>iglB</i> (FTN_1323)                                                                                                                                                                                                                                                                                | This study |
| Fn-IgIA-GFP $\Delta iglC$                   | Fn-IgIA-GFP with deletion of <i>iglC</i> (FTN_1322)                                                                                                                                                                                                                                                                                | This study |
| Fn-IgIA/B-split GFP                         | Fn expressing IgIA/B-split GFP; chromosomal <i>iglA</i> replaced by a copy of <i>iglA</i> fused with the coding sequence for superfolder GFP domains 1-10 (GFP1-10) at its 3' end and chromosomal <i>iglB</i> replaced by a copy of <i>iglB</i> fused with the coding sequence for superfolder GFP domain 11 (GFP11) at its 5' end | This study |
| Fn-IgIA $\Delta$ 18N/B-split GFP            | Fn-IgIA/B-split GFP with deletion of amino acid residues #2-18 of IgIA                                                                                                                                                                                                                                                             | This study |
| Fn-IgIA/B $\Delta$ C25-split GFP            | Fn-IgIA/B-split GFP with deletion of the last 25 amino acid residues #482-506 of IgIB                                                                                                                                                                                                                                              | This study |
| Fn-IgIA/SodB-split GFP                      | Fn expressing IgIA/SodB-split GFP; chromosomal <i>iglA</i> replaced by a copy of <i>iglA</i> fused with the coding sequence for GFP1-10 at its 3' end and chromosomal <i>sodB</i> (FTN_1642) replaced by a copy of <i>sodB</i> fused with the coding sequence for GFP11 at its 5' end                                              | This study |
| Fn-IgIA/B-split GFP, FLAG-VgrG              | Fn-IgIA/B-split GFP strain expressing FLAG-VgrG; chromosomal <i>vgrG</i> replaced by a copy of <i>vgrG</i> fused with the coding sequence for 3xFLAG epitope at its 5' end                                                                                                                                                         | This study |
| Fn-IgIA $\Delta$ 18N/B-split GFP, FLAG-VgrG | Fn-IgIA $\Delta$ 18N/B-split GFP strain expressing FLAG-VgrG; chromosomal <i>vgrG</i> replaced by a copy of <i>vgrG</i> fused with the coding sequence for 3xFLAG epitope at its 5' end                                                                                                                                            | This study |
| Fn-IgIA/B $\Delta$ C25-split GFP, FLAG-VgrG | Fn-IgIA/B $\Delta$ C25-split GFP strain expressing FLAG-VgrG; chromosomal <i>vgrG</i> replaced by a copy of <i>vgrG</i> fused with the coding sequence for 3xFLAG epitope at its 5' end                                                                                                                                            | This study |

\* Karl Klose, University of Texas San Antonio, San Antonio, TX
